# Supplementary material for: 'Off-the-shelf’ allogeneic antigen-specific adoptive T-cell therapy for the treatment of multiple EBV-associated malignancies
Source: PubMed Central journal article supplement (PMC7887372; doi:10.1136/jitc-2020-001608), 2021-02-15
Supplement: jitc-2020-001608supp001.pdf [file jitc-2020-001608supp001.pdf]

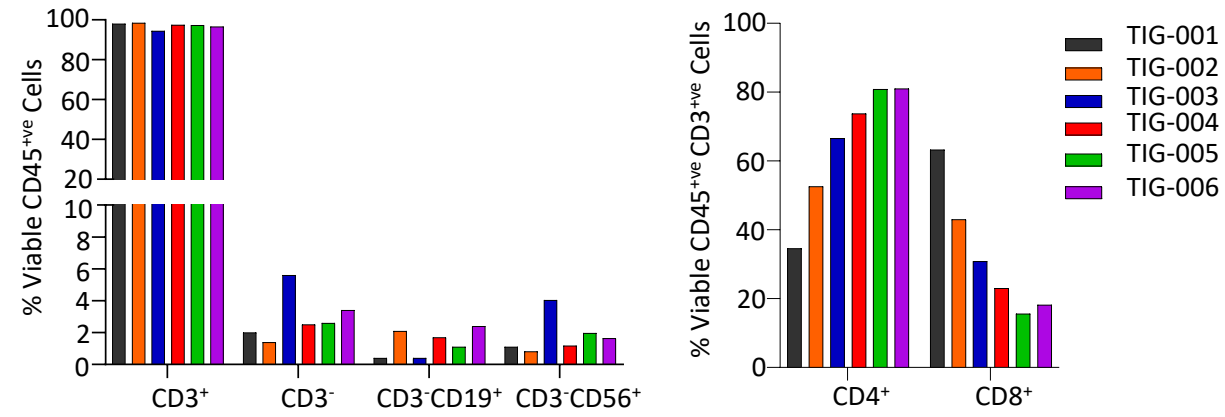

Supp Fig. 1

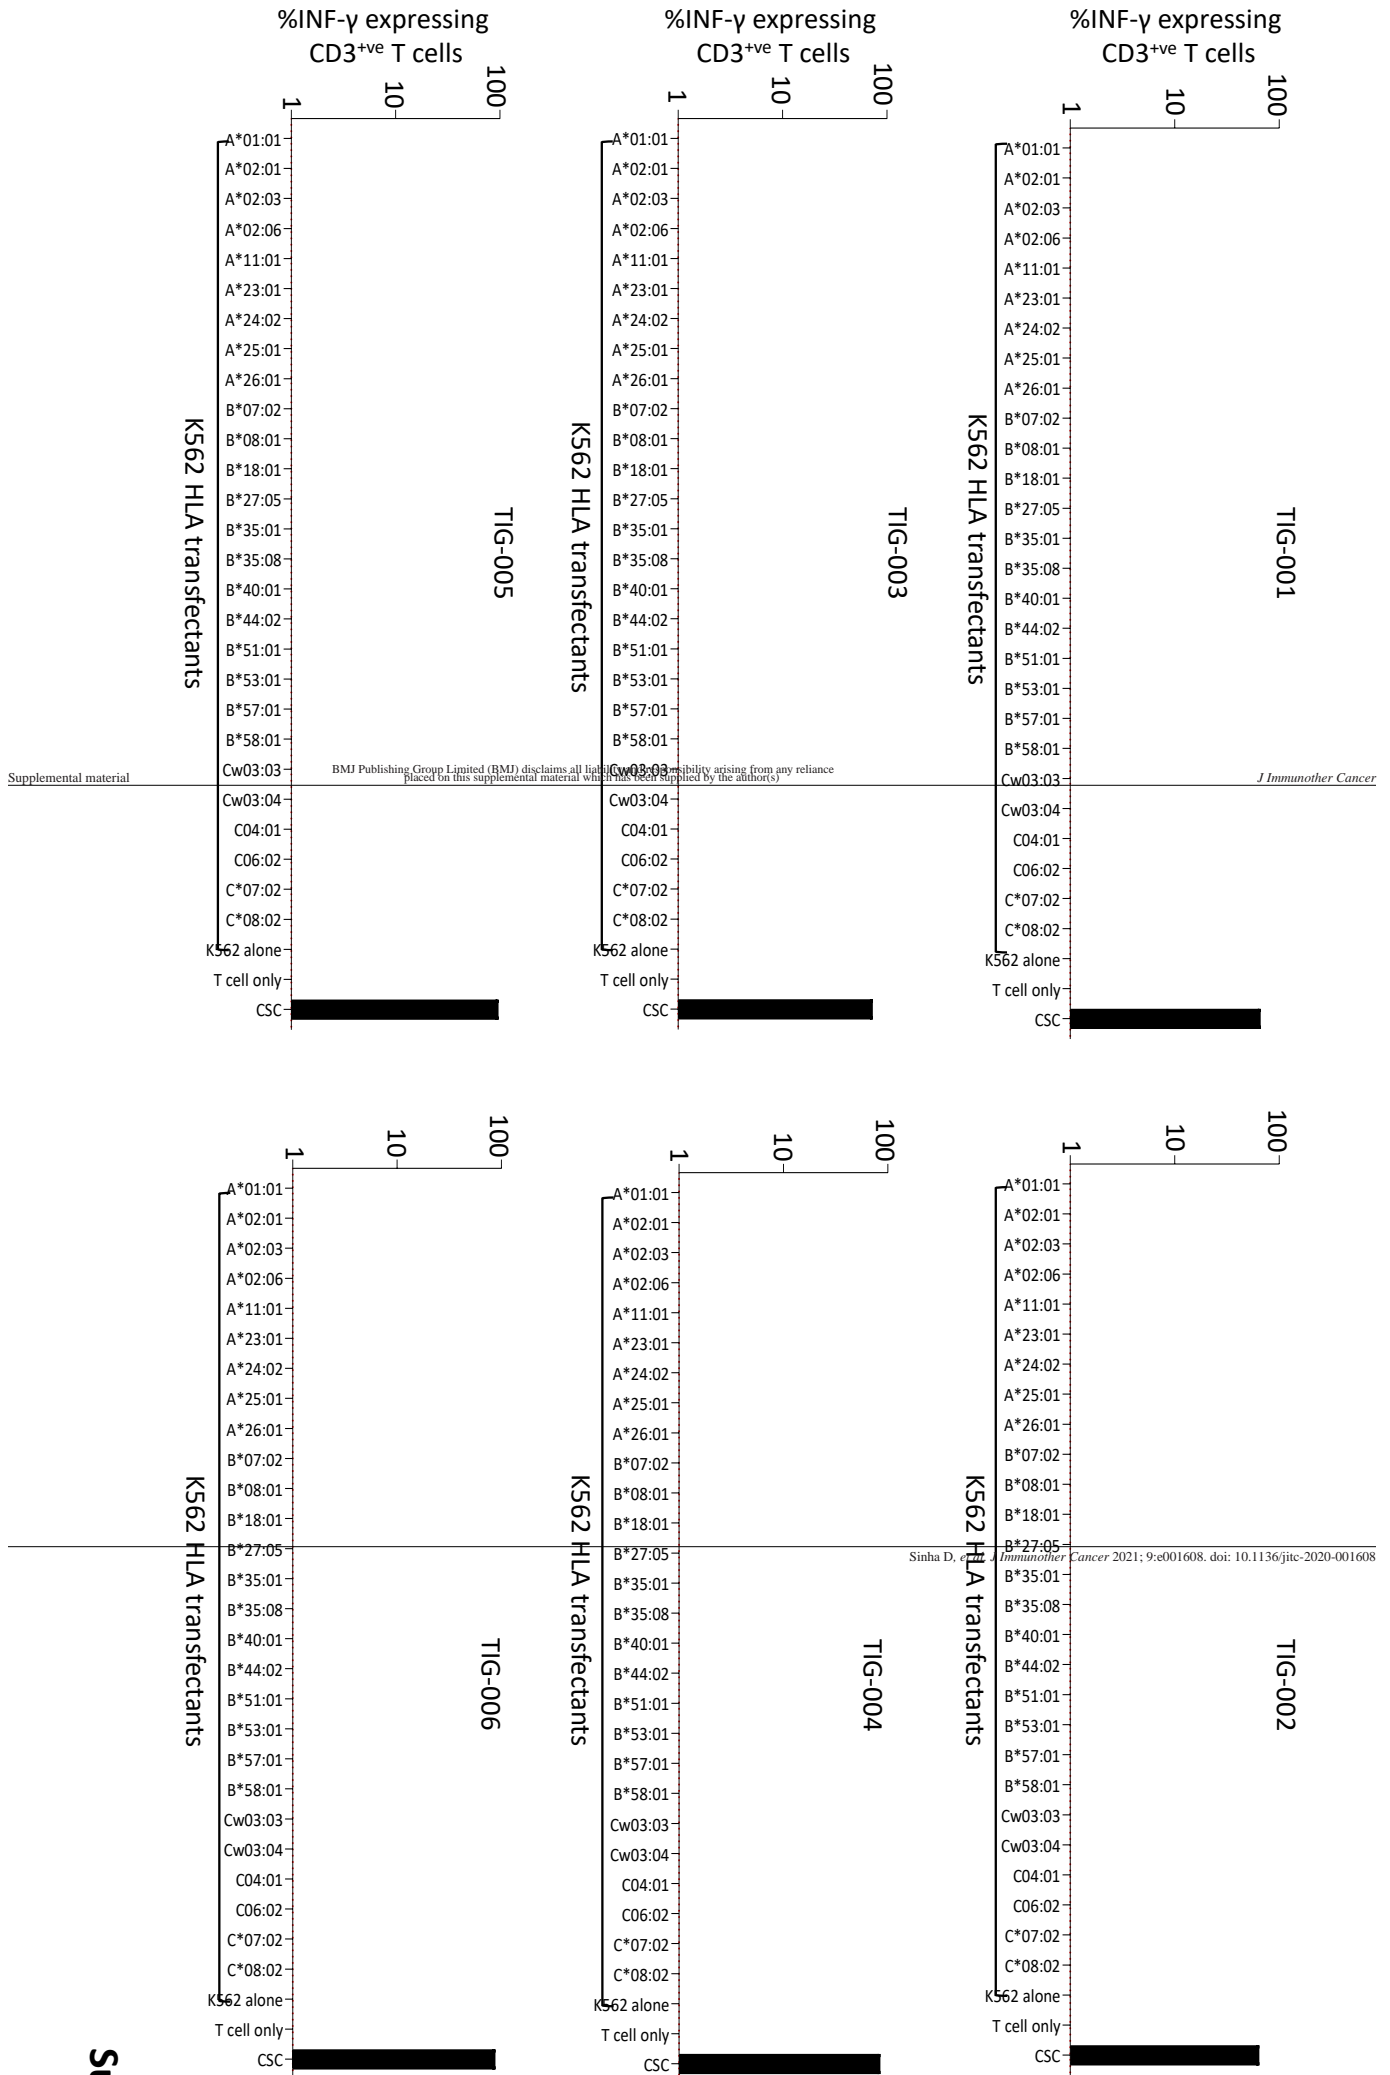

Supplemental material

BMJ Publishing Group Limited (BMJ) disclaims all liability and responsibility arising from any reliance placed on this supplemental material which has been supplied by the author(s)

*J Immunother Cancer*

Sinha D, et al. *J Immunother Cancer* 2021; 9:e001608. doi: 10.1136/jitc-2020-001608

Supp Fig. 2

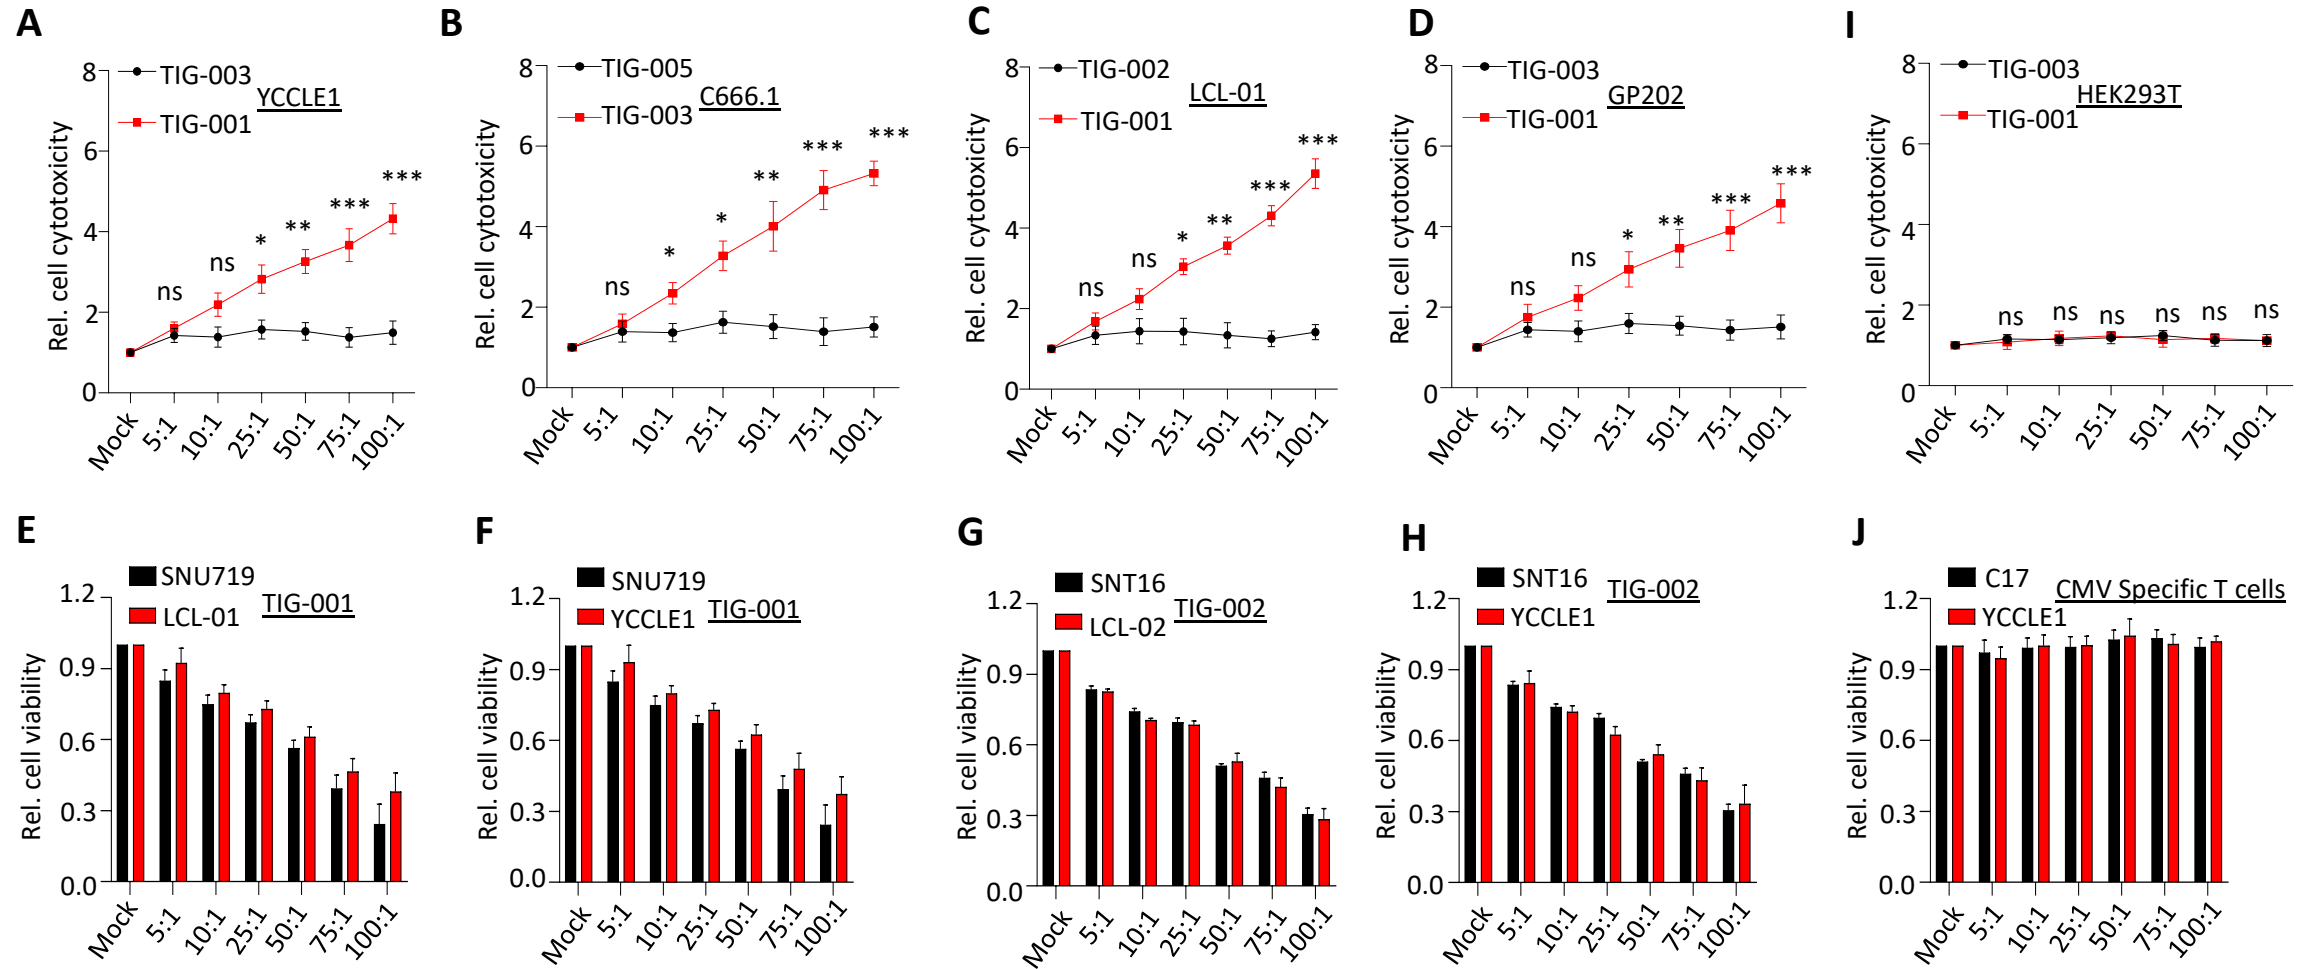

Supp Fig. 3

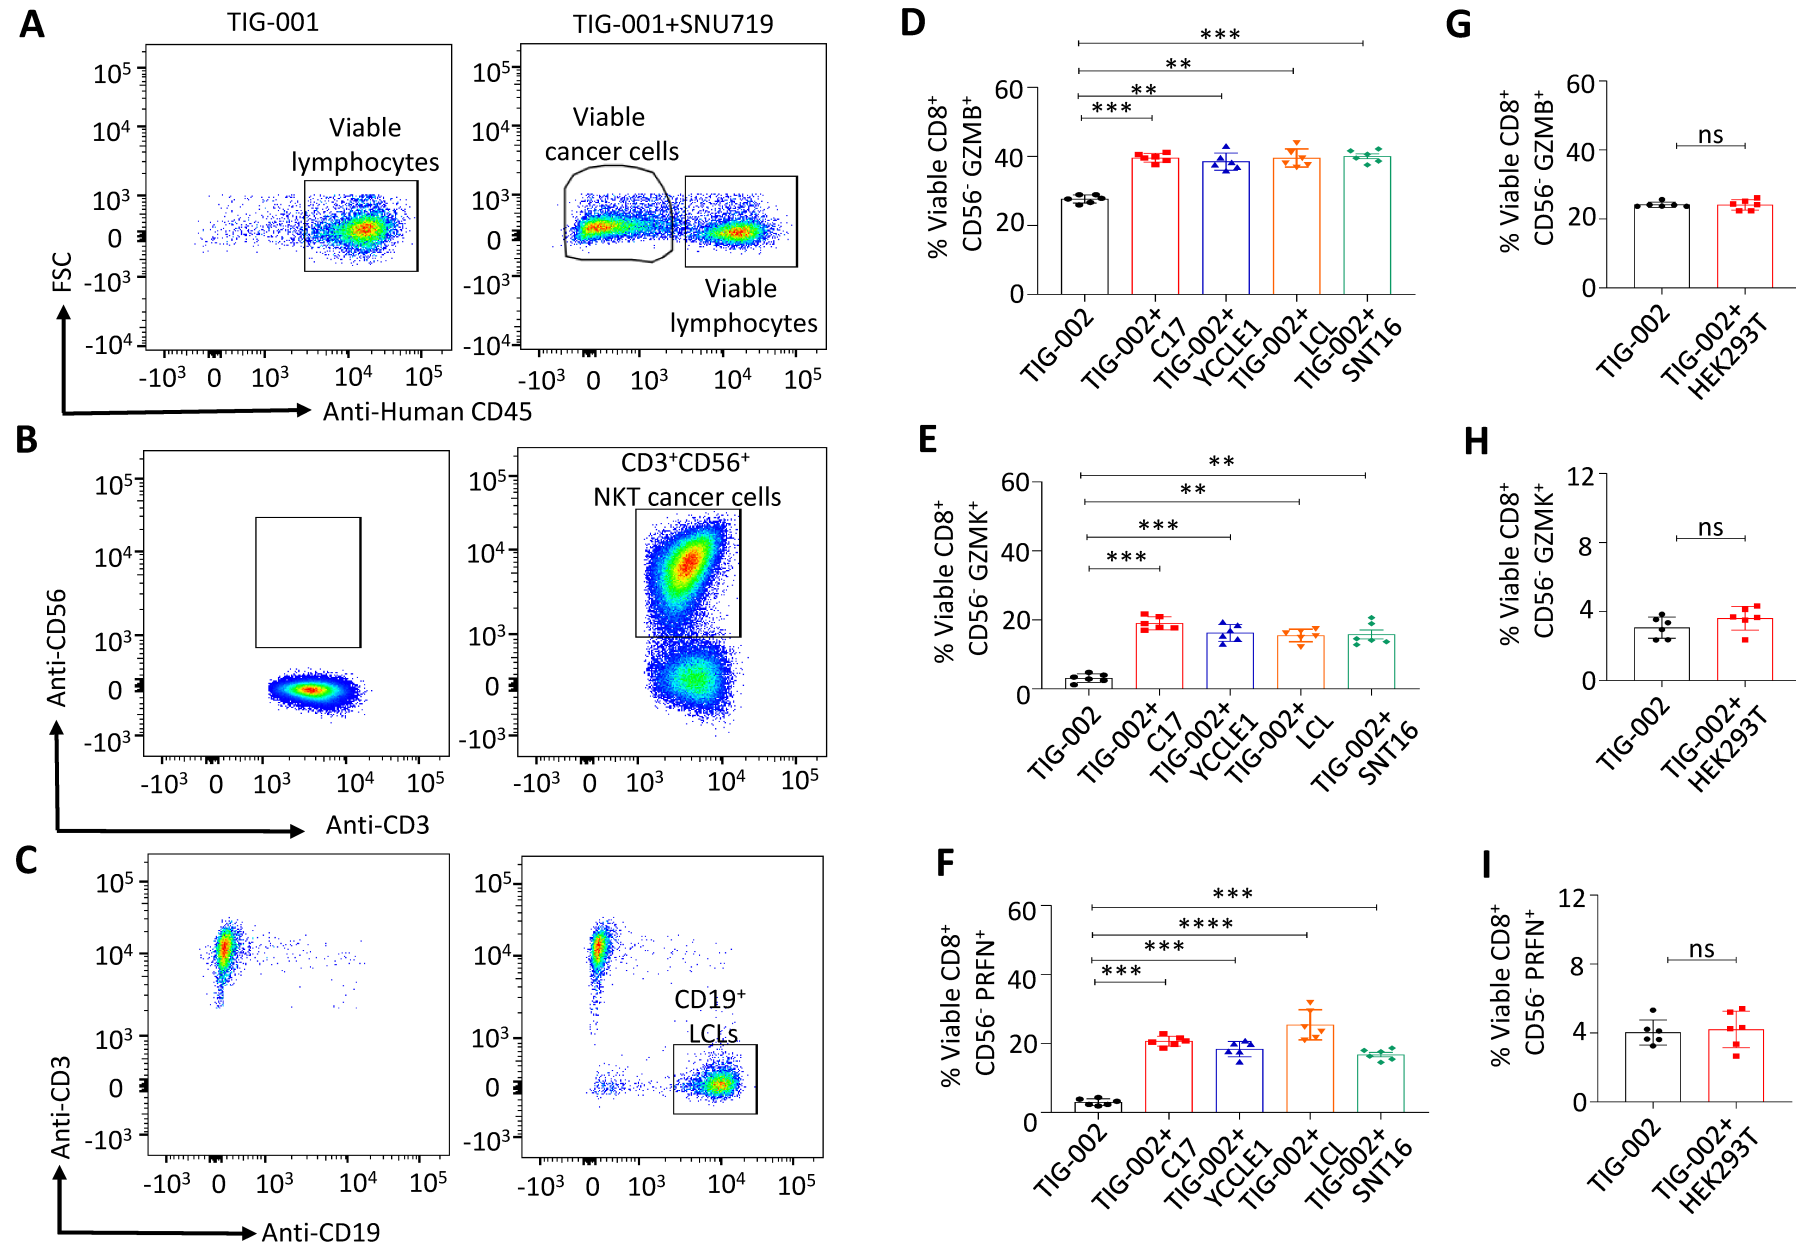

Supp Fig. 4



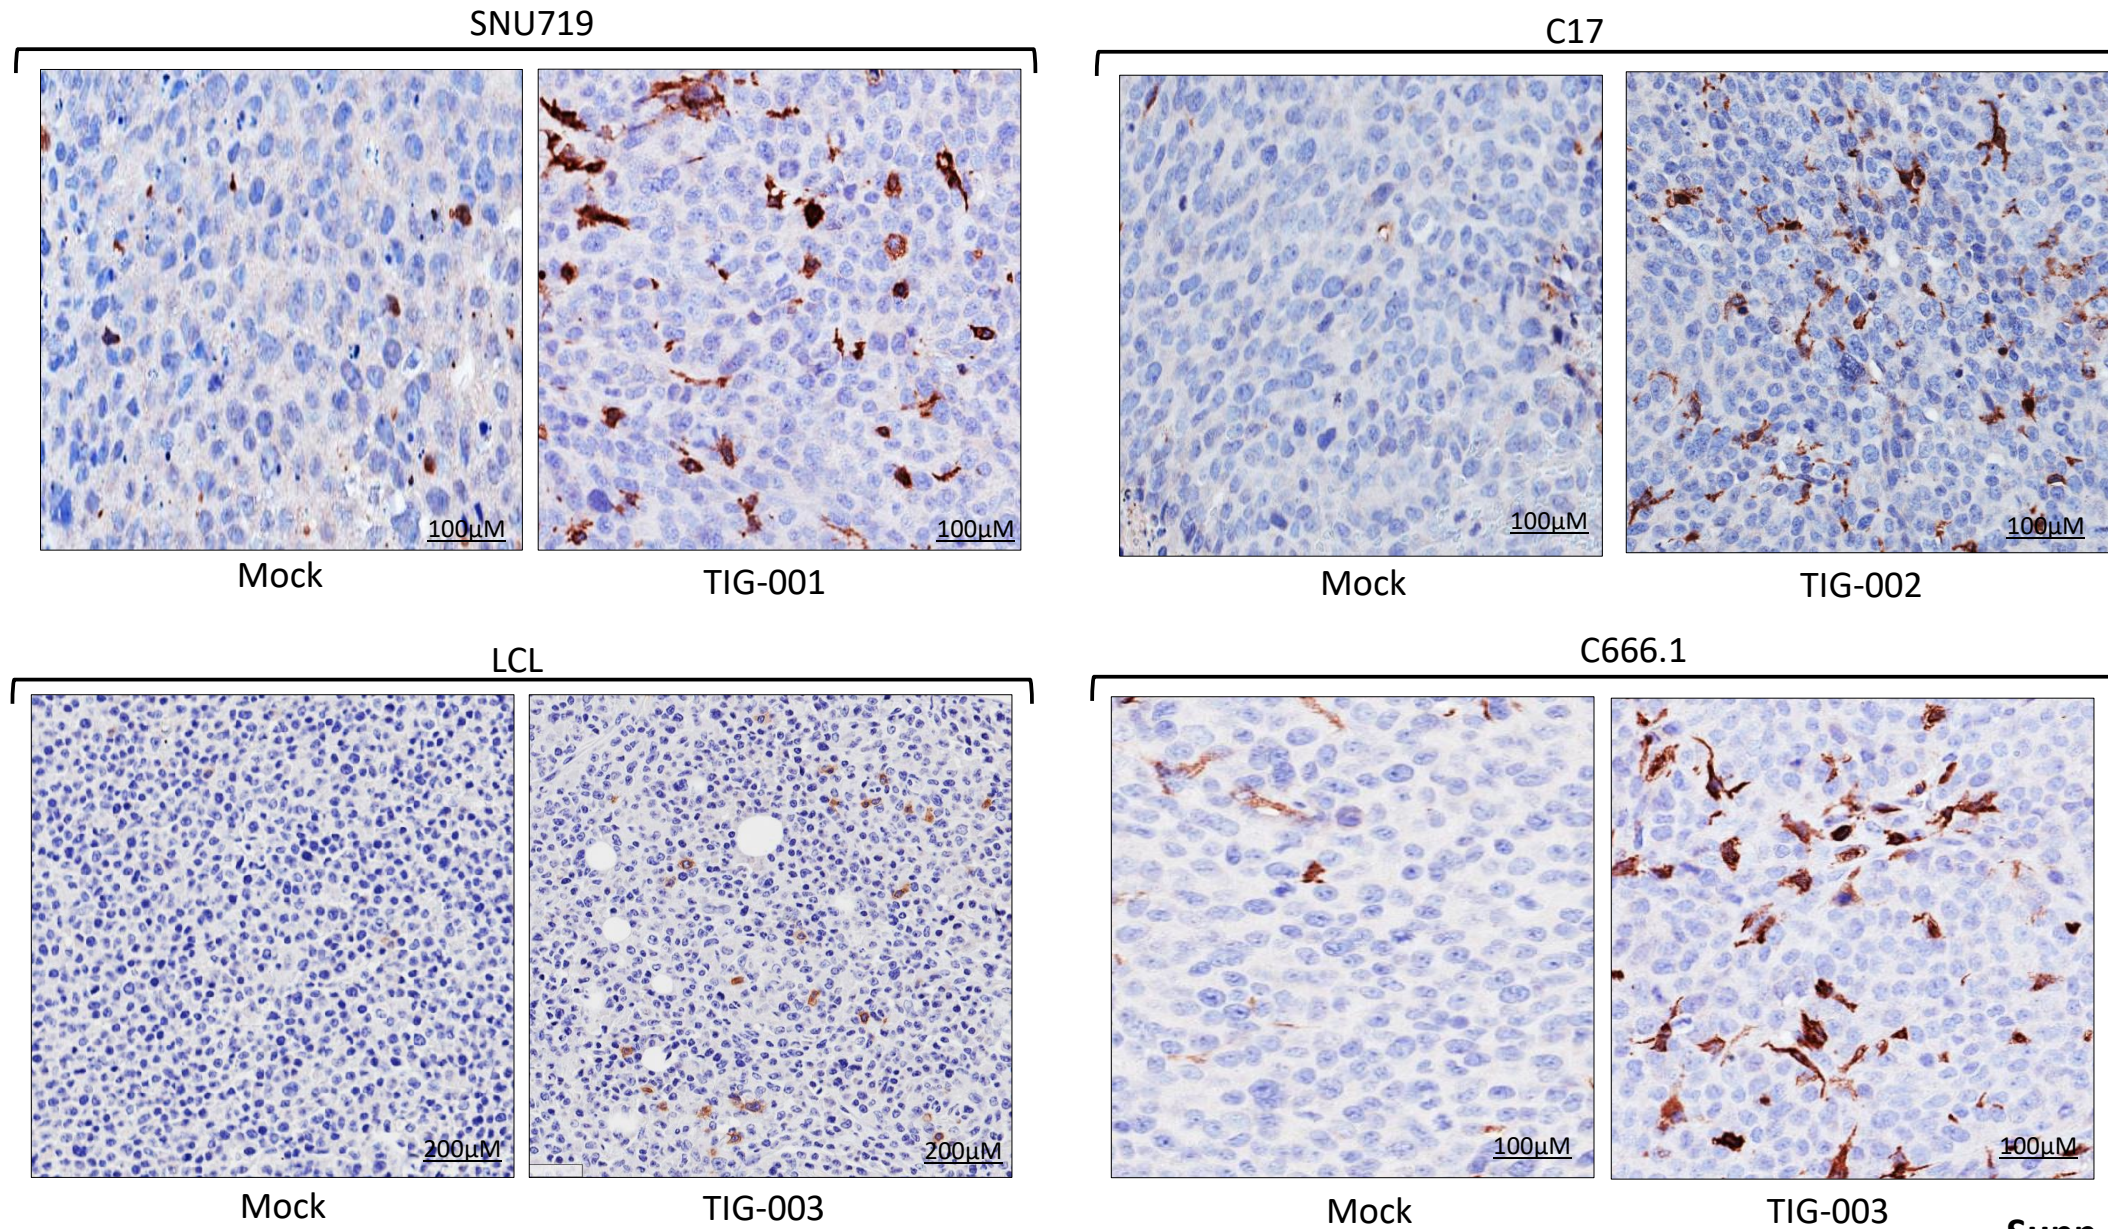

Supp Fig. 5

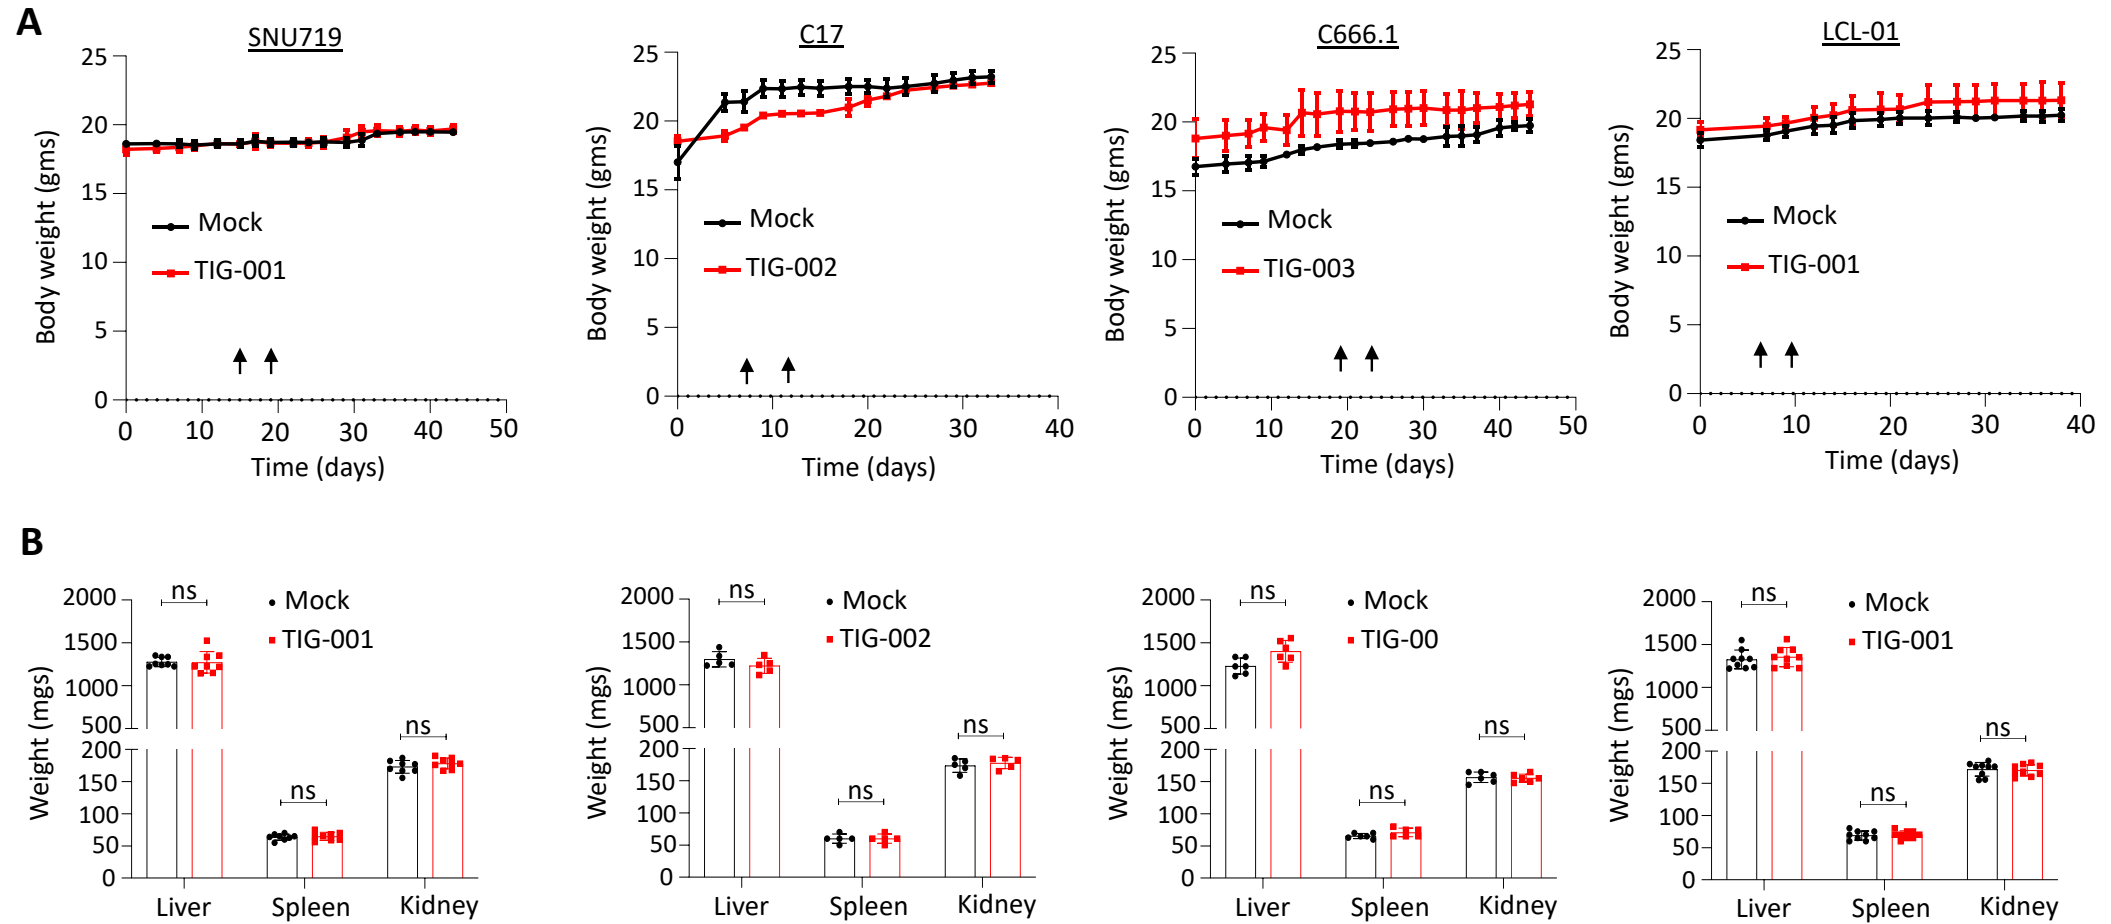

Supp Fig. 6

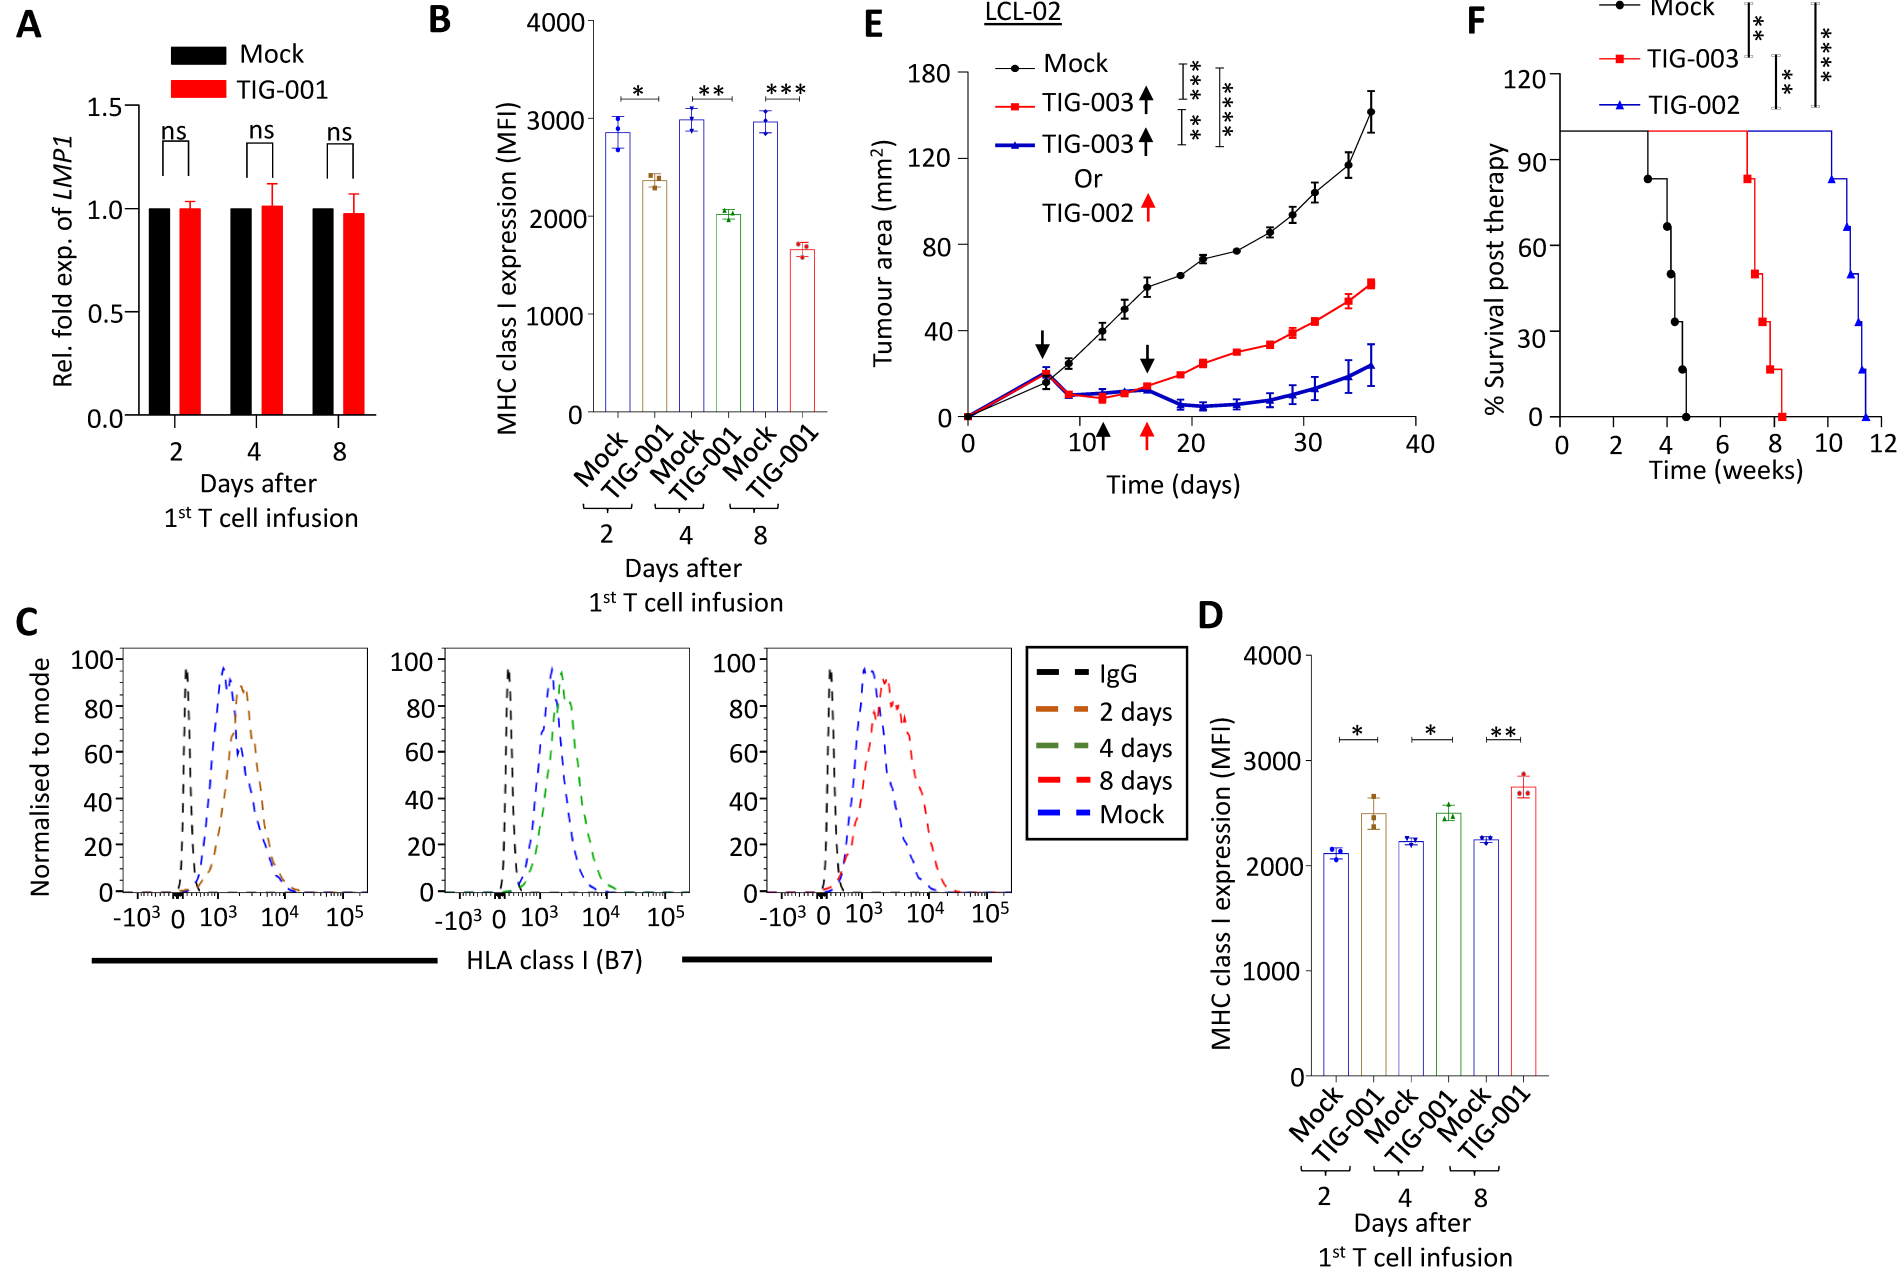

Supp Fig. 7



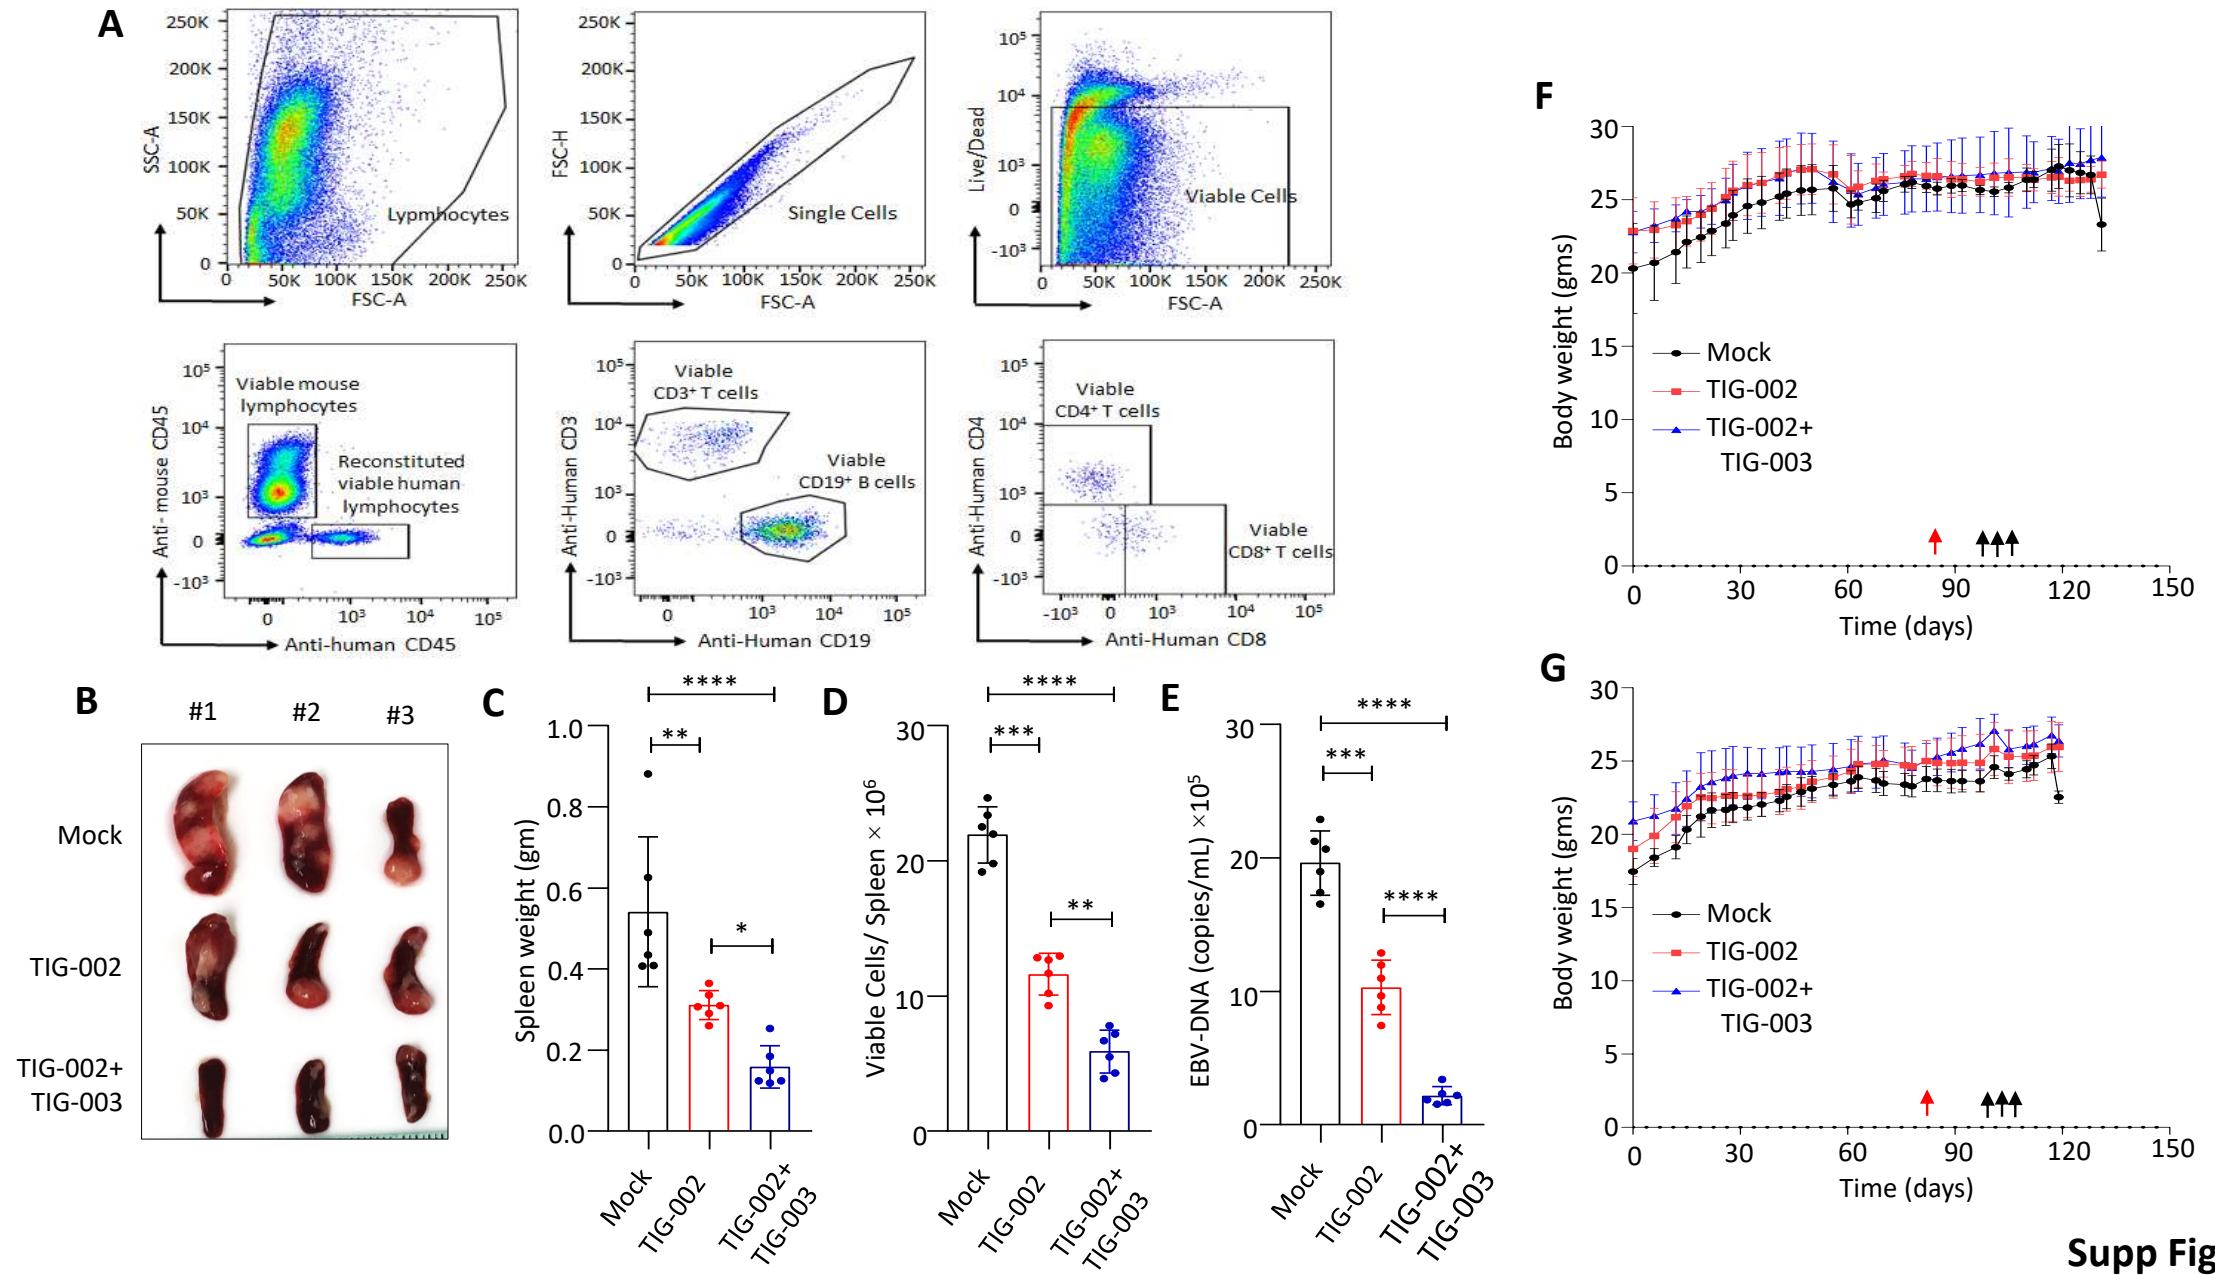

Supp Fig. 8
